# Supplementary material for: Identification of a common risk haplotype for canine idiopathic epilepsy in the ADAM23 gene
Source: PubMed Central journal article supplement (PMC4470040; doi:10.1186/s12864-015-1651-9), 2015-06-18
Supplement: 12864_2015_1651_MOESM3_ESM.pdf [file 12864_2015_1651_MOESM3_ESM.pdf]

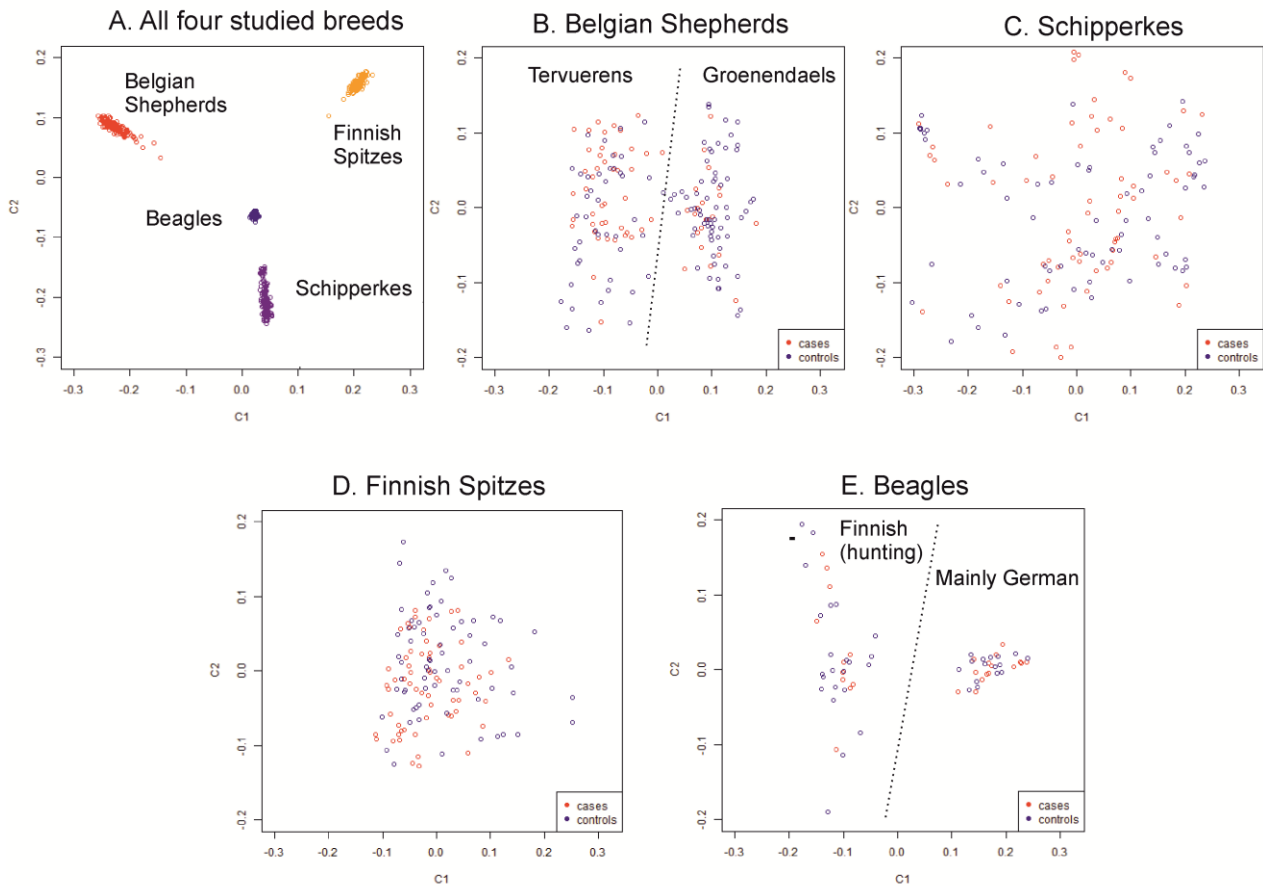

**Additional Figure 1. Multidimensional scaling plots.** All studied breeds (A) were distinct genetic populations, presented by multidimensional scaling plots. There is no substructure in the Finnish Spitz (D) and Schipperke (C) cohorts. In Belgian Shepherd (B) and Beagle (E) cohorts, two subpopulations were identified, and represent breed lines.
