# Supplementary material for: Identification of a common risk haplotype for canine idiopathic epilepsy in the ADAM23 gene
Source: PubMed Central journal article supplement (PMC4470040; doi:10.1186/s12864-015-1651-9), 2015-06-18
Supplement: 12864_2015_1651_MOESM4_ESM.pdf [file 12864_2015_1651_MOESM4_ESM.pdf]

## A. Belgian Shepherds

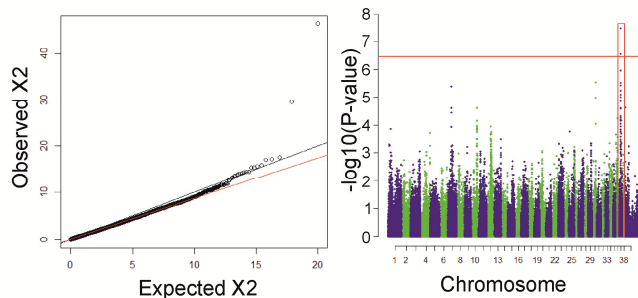

## B. Schipperkes

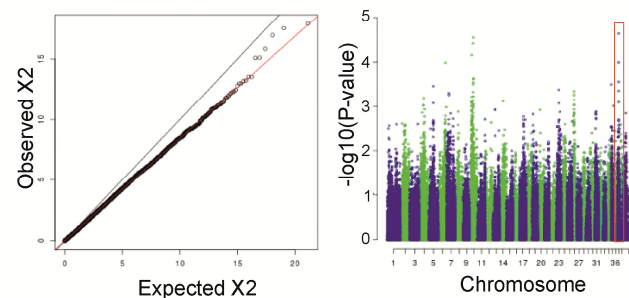

## C. Finnish Spitzes

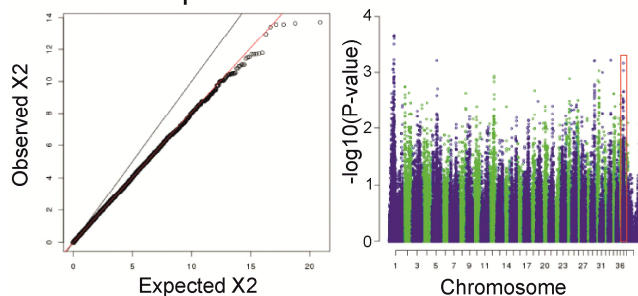

## D. Beagles

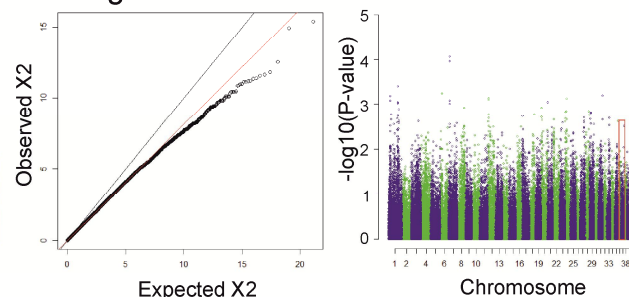

## E. All four breeds combined

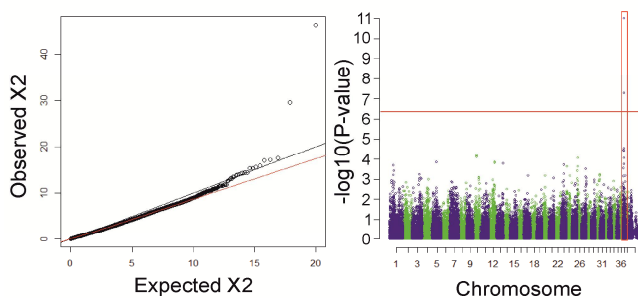

## F. Schipperkes, Finnish Spitzes and Beagles

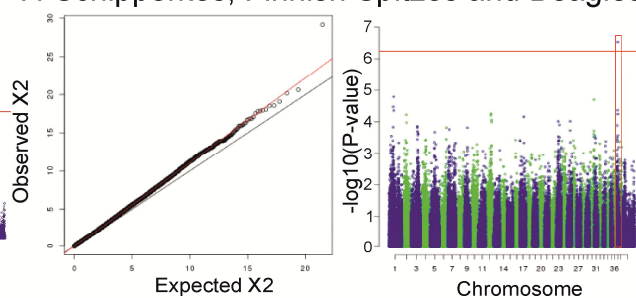

Additional Figure 2. Results of the genome-wide association study (GWAS). Quantile-quantile and association plots of the GWAS in four dog breeds individually (A-D), and combined cohorts (E-F). The red line on the Manhattan plots for Belgian Shepherds (A), Schipperkes, Finnish Spitzes and Beagles (E) and all four breeds (F) represents the p-value level of genome-wide significance. The GWAS in Schipperkes, Finnish Spitzes or Beagles alone did not reach genome-wide significance. CFA37 is highlighted with a red outline in the Manhattan plots.
