# Supplementary material for: Identification of a common risk haplotype for canine idiopathic epilepsy in the ADAM23 gene
Source: PubMed Central journal article supplement (PMC4470040; doi:10.1186/s12864-015-1651-9), 2015-06-18
Supplement: 12864_2015_1651_MOESM7_ESM.pdf [file 12864_2015_1651_MOESM7_ESM.pdf]

Additional Table 3. Association results of the validation of the 26 *ADAM23* variants in 285 cases and 355 controls with idiopathic epilepsy.

| CHR37_15085438 (BICF2S23030950); INTRONIC TO <i>ADAM23</i> |     |         |        |    |          | P(CMH) 1.3e-14   | OR 3.043 (2.278-4.063)    |        |          |        |
|------------------------------------------------------------|-----|---------|--------|----|----------|------------------|---------------------------|--------|----------|--------|
| Breed                                                      | A1  | F_A     | F_U    | A2 | CHISQ    | P                | OR                        | SE     | L95      | U95    |
| Belgian Shepherds                                          | T   | 0.756   | 0.4766 | G  | 46.77    | 7.985e-12        | 3.402                     | 0.1828 | 2.378    | 4.868  |
| Schipperkes                                                | T   | 0.9706  | 0.9928 | G  | 1.878    | 0.1705           | 0.2409                    | 1.125  | 0.02658  | 2.183  |
| Finnish Spitzs                                             | T   | 0.8898  | 0.6716 | G  | 17.07    | 3.609e-05        | 3.949                     | 0.3468 | 2.001    | 7.792  |
| Beagles (Finnish hunting)                                  | T   | 0.9643  | 0.7292 | G  | 6.505    | 0.01076          | 10.03                     | 1.069  | 1.234    | 81.49  |
| Beagles (other)                                            | T   | 0.625   | 0.6154 | G  | 0.004897 | 0.9442           | 1.042                     | 0.5833 | 0.332    | 3.268  |
| CHR37_15093174 (BICF2P1290526); INTRONIC TO <i>ADAM23</i>  |     |         |        |    |          | P(CMH) 4.121e-06 | OR 0.5563 (0.4329-0.7149) |        |          |        |
| Breed                                                      | A1  | F_A     | F_U    | A2 | CHISQ    | P                | OR                        | SE     | L95      | U95    |
| Belgian Shepherds                                          | T   | 0.7024  | 0.7386 | C  | 0.965    | 0.3259           | 0.8351                    | 0.1836 | 0.5827   | 1.197  |
| Schipperkes                                                | T   | 0.1866  | 0.3714 | C  | 11.58    | 0.0006666        | 0.3881                    | 0.2824 | 0.2231   | 0.6752 |
| Finnish Spitzs                                             | T   | 0.123   | 0.3603 | C  | 19.42    | 1.048e-05        | 0.2489                    | 0.3285 | 0.1307   | 0.4739 |
| Beagles (Finnish hunting)                                  | T   | 0.03571 | 0.32   | C  | 8.51     | 0.003531         | 0.0787                    | 1.063  | 0.009808 | 0.6316 |
| Beagles (other)                                            | T   | 0.4667  | 0.4062 | C  | 0.2299   | 0.6316           | 1.279                     | 0.5133 | 0.4676   | 3.497  |
| CHR37_15106446 (BICF2P1021781); INTRONIC TO <i>ADAM23</i>  |     |         |        |    |          | P(CMH) 5.297e-15 | OR 2.878 (2.197-3.77)     |        |          |        |
| Breed                                                      | A1  | F_A     | F_U    | A2 | CHISQ    | P                | OR                        | SE     | L95      | U95    |
| Belgian Shepherds                                          | C   | 0.756   | 0.4794 | T  | 45.8     | 1.313e-11        | 3.364                     | 0.1829 | 2.351    | 4.815  |
| Schipperkes                                                | C   | 0.8088  | 0.65   | T  | 8.793    | 0.003024         | 2.278                     | 0.281  | 1.313    | 3.951  |
| Finnish Spitzs                                             | C   | 0.9576  | 0.8582 | T  | 7.197    | 0.007301         | 3.734                     | 0.5198 | 1.348    | 10.34  |
| Beagles (Finnish hunting)                                  | C   | 0.9643  | 0.7083 | T  | 7.313    | 0.006845         | 11.12                     | 1.067  | 1.374    | 89.95  |
| Beagles (other)                                            | C   | 0.6333  | 0.6333 | T  | 0        | 1                | 1                         | 0.5358 | 0.3499   | 2.858  |
| CHR37_15108593; INTRONIC TO <i>ADAM23</i>                  |     |         |        |    |          | P(CMH) 5.052e-15 | OR 2.865 (2.19-3.748)     |        |          |        |
| Breed                                                      | A1  | F_A     | F_U    | A2 | CHISQ    | P                | OR                        | SE     | L95      | U95    |
| Belgian Shepherds                                          | del | 0.752   | 0.4766 | A  | 45.82    | 1.294e-11        | 3.329                     | 0.1812 | 2.334    | 4.749  |
| Schipperkes                                                | del | 0.8088  | 0.65   | A  | 8.793    | 0.003024         | 2.278                     | 0.281  | 1.313    | 3.951  |
| Finnish Spitzs                                             | del | 0.9576  | 0.8582 | A  | 7.197    | 0.007301         | 3.734                     | 0.5198 | 1.348    | 10.34  |
| Beagles (Finnish hunting)                                  | del | 0.9643  | 0.7083 | A  | 7.313    | 0.006845         | 11.12                     | 1.067  | 1.374    | 89.95  |
| Beagles (other)                                            | del | 0.6333  | 0.6333 | A  | 0        | 1                | 1                         | 0.5358 | 0.3499   | 2.858  |
| CHR37_15108802; INTRONIC TO <i>ADAM23</i>                  |     |         |        |    |          | P(CMH) 5.052e-15 | OR 2.865 (2.19-3.748)     |        |          |        |
| Breed                                                      | A1  | F_A     | F_U    | A2 | CHISQ    | P                | OR                        | SE     | L95      | U95    |

|                                                    |            |        |        |          |           |                  |                           |        |        |        |
|----------------------------------------------------|------------|--------|--------|----------|-----------|------------------|---------------------------|--------|--------|--------|
| Belgian Shepherds                                  | <i>del</i> | 0.752  | 0.4766 | <i>T</i> | 45.82     | 1.294e-11        | 3.329                     | 0.1812 | 2.334  | 4.749  |
| Schipperkes                                        | <i>del</i> | 0.8088 | 0.65   | <i>T</i> | 8.793     | 0.003024         | 2.278                     | 0.281  | 1.313  | 3.951  |
| Finnish Spitzs                                     | <i>del</i> | 0.9576 | 0.8582 | <i>T</i> | 7.197     | 0.007301         | 3.734                     | 0.5198 | 1.348  | 10.34  |
| Beagles (Finnish hunting)                          | <i>del</i> | 0.9643 | 0.7083 | <i>T</i> | 7.313     | 0.006845         | 11.12                     | 1.067  | 1.374  | 89.95  |
| Beagles (other)                                    | <i>del</i> | 0.6333 | 0.6333 | <i>T</i> | 0         | 1                | 1                         | 0.5358 | 0.3499 | 2.858  |
| CHR37_15111724 (BICF2P1131874); INTRONIC TO ADAM23 |            |        |        |          |           | P(CMH) 4.15e-15  | OR 2.892 (2.207-3.79)     |        |        |        |
| Breed                                              | A1         | F_A    | F_U    | A2       | CHISQ     | P                | OR                        | SE     | L95    | U95    |
| Belgian Shepherds                                  | <i>G</i>   | 0.756  | 0.4856 | <i>A</i> | 44.26     | 2.872e-11        | 3.282                     | 0.1822 | 2.296  | 4.69   |
| Schipperkes                                        | <i>G</i>   | 0.8209 | 0.65   | <i>A</i> | 10.23     | 0.001381         | 2.468                     | 0.2866 | 1.407  | 4.328  |
| Finnish Spitzs                                     | <i>G</i>   | 0.959  | 0.8529 | <i>A</i> | 8.269     | 0.004033         | 4.034                     | 0.5169 | 1.465  | 11.11  |
| Beagles (Finnish hunting)                          | <i>G</i>   | 0.9643 | 0.72   | <i>A</i> | 6.896     | 0.00864          | 10.5                      | 1.066  | 1.3    | 84.83  |
| Beagles (other)                                    | <i>G</i>   | 0.6333 | 0.6562 | <i>A</i> | 0.03552   | 0.8505           | 0.9048                    | 0.5311 | 0.3195 | 2.562  |
| CHR37_15113325; INTRONIC TO ADAM23                 |            |        |        |          |           | P(CMH) 2.757e-15 | OR 2.932 (2.234-3.849)    |        |        |        |
| Breed                                              | A1         | F_A    | F_U    | A2       | CHISQ     | P                | OR                        | SE     | L95    | U95    |
| Belgian Shepherds                                  | <i>G</i>   | 0.754  | 0.4766 | <i>A</i> | 46.29     | 1.019e-11        | 3.365                     | 0.182  | 2.356  | 4.808  |
| Schipperkes                                        | <i>G</i>   | 0.8088 | 0.65   | <i>A</i> | 8.793     | 0.003024         | 2.278                     | 0.281  | 1.313  | 3.951  |
| Finnish Spitzs                                     | <i>G</i>   | 0.9737 | 0.8692 | <i>A</i> | 8.807     | 0.003002         | 5.566                     | 0.6403 | 1.587  | 19.53  |
| Beagles (Finnish hunting)                          | <i>G</i>   | 0.9643 | 0.7174 | <i>A</i> | 6.917     | 0.00854          | 10.64                     | 1.07   | 1.307  | 86.56  |
| Beagles (other)                                    | <i>G</i>   | 0.6333 | 0.6333 | <i>A</i> | 0         | 1                | 1                         | 0.5358 | 0.3499 | 2.858  |
| CHR37_15113726; INTRONIC TO ADAM23                 |            |        |        |          |           | P(CMH) 1.326e-10 | OR 2.499 (1.882-3.318)    |        |        |        |
| Breed                                              | A1         | F_A    | F_U    | A2       | CHISQ     | P                | OR                        | SE     | L95    | U95    |
| Belgian Shepherds                                  | <i>G</i>   | 0.7619 | 0.4688 | <i>A</i> | 26.93     | 2.112e-07        | 3.627                     | 0.2543 | 2.203  | 5.97   |
| Schipperkes                                        | <i>G</i>   | 0.8308 | 0.6167 | <i>A</i> | 14.45     | 0.0001443        | 3.052                     | 0.2999 | 1.695  | 5.493  |
| Finnish Spitzs                                     | <i>G</i>   | 0.7105 | 0.5909 | <i>A</i> | 3.829     | 0.05037          | 1.699                     | 0.272  | 0.9971 | 2.896  |
| Beagles (Finnish hunting)                          | <i>G</i>   | 0.9643 | 0.6667 | <i>A</i> | 9.021     | 0.00267          | 13.5                      | 1.063  | 1.679  | 108.5  |
| Beagles (other)                                    | <i>G</i>   | 0.5333 | 0.5938 | <i>A</i> | 0.2299    | 0.6316           | 0.782                     | 0.5133 | 0.2859 | 2.138  |
| CHR37_15113939; ADAM23 EXON12; c. 1158C>T, p.R387C |            |        |        |          |           | P(CMH) 0.001441  | OR 0.5887 (0.4247-0.8159) |        |        |        |
| Breed                                              | A1         | F_A    | F_U    | A2       | CHISQ     | P                | OR                        | SE     | L95    | U95    |
| Belgian Shepherds                                  | <i>C</i>   | 0.9937 | 1      | <i>T</i> | 1.637     | 0.2008           | 0                         | Inf    | 0      | nan    |
| Schipperkes                                        | <i>C</i>   | 0.4179 | 0.587  | <i>T</i> | 7.772     | 0.005307         | 0.5052                    | 0.2461 | 0.3119 | 0.8184 |
| Finnish Spitzs                                     | <i>C</i>   | 0.3534 | 0.4776 | <i>T</i> | 3.935     | 0.04729          | 0.5979                    | 0.2601 | 0.3591 | 0.9954 |
| Beagles (Finnish hunting)                          | <i>C</i>   | 0.8929 | 0.8913 | <i>T</i> | 0.0004353 | 0.9834           | 1.016                     | 0.7731 | 0.2233 | 4.625  |

|                                                   |    |         |         |    |           |                  |                        |        |        |       |
|---------------------------------------------------|----|---------|---------|----|-----------|------------------|------------------------|--------|--------|-------|
| Beagles (other)                                   | C  | 0.8333  | 0.7812  | T  | 0.2691    | 0.6039           | 1.4                    | 0.6503 | 0.3914 | 5.008 |
| CHR37_15113940; ADAM23 EXON12; c.1159G>A, p.R387H |    |         |         |    |           | P(CMH) 1.671e-08 | OR 2.098 (1.617-2.722) |        |        |       |
| Breed                                             | A1 | F_A     | F_U     | A2 | CHISQ     | P                | OR                     | SE     | L95    | U95   |
| Belgian Shepherds                                 | A  | 0.748   | 0.4766  | G  | 44.47     | 2.589e-11        | 3.26                   | 0.1806 | 2.288  | 4.645 |
| Schipperkes                                       | A  | 0.2164  | 0.2174  | G  | 0.0003792 | 0.9845           | 0.9943                 | 0.2943 | 0.5585 | 1.77  |
| Finnish Spitzs                                    | A  | 0.0678  | 0.06716 | G  | 0.0003989 | 0.9841           | 1.01                   | 0.5032 | 0.3767 | 2.708 |
| Beagles (Finnish hunting)                         | A  | 0.8571  | 0.56    | G  | 7.131     | 0.007574         | 4.714                  | 0.6106 | 1.425  | 15.6  |
| Beagles (other)                                   | A  | 0.3667  | 0.375   | G  | 0.004608  | 0.9459           | 0.9649                 | 0.5262 | 0.344  | 2.706 |
| CHR37_15114127; INTRONIC TO ADAM23                |    |         |         |    |           | P(CMH) 1.17e-11  | OR 2.506 (1.915-3.28)  |        |        |       |
| Breed                                             | A1 | F_A     | F_U     | A2 | CHISQ     | P                | OR                     | SE     | L95    | U95   |
| Belgian Shepherds                                 | T  | 0.7595  | 0.469   | G  | 33.93     | 5.707e-09        | 3.575                  | 0.2241 | 2.305  | 5.547 |
| Schipperkes                                       | T  | 0.8154  | 0.627   | G  | 11.33     | 0.000762         | 2.628                  | 0.2916 | 1.484  | 4.654 |
| Finnish Spitzs                                    | T  | 0.7155  | 0.5896  | G  | 4.325     | 0.03755          | 1.751                  | 0.2705 | 1.03   | 2.976 |
| Beagles (Finnish hunting)                         | T  | 0.9643  | 0.6667  | G  | 9.021     | 0.00267          | 13.5                   | 1.063  | 1.679  | 108.5 |
| Beagles (other)                                   | T  | 0.5333  | 0.5938  | G  | 0.2299    | 0.6316           | 0.782                  | 0.5133 | 0.2859 | 2.138 |
| CHR37_15114156; INTRONIC TO ADAM23                |    |         |         |    |           | P(CMH) 2.686e-14 | OR 2.559 (2.002-3.271) |        |        |       |
| Breed                                             | A1 | F_A     | F_U     | A2 | CHISQ     | P                | OR                     | SE     | L95    | U95   |
| Belgian Shepherds                                 | C  | 0.7602  | 0.4763  | T  | 47.63     | 5.144e-12        | 3.484                  | 0.1848 | 2.426  | 5.006 |
| Schipperkes                                       | C  | 0.8015  | 0.6286  | T  | 10.09     | 0.001487         | 2.386                  | 0.2771 | 1.386  | 4.107 |
| Finnish Spitzs                                    | C  | 0.7203  | 0.5896  | T  | 4.723     | 0.02977          | 1.793                  | 0.27   | 1.056  | 3.044 |
| Beagles (Finnish hunting)                         | C  | 0.9643  | 0.68    | T  | 8.51      | 0.003531         | 12.71                  | 1.063  | 1.583  | 102   |
| Beagles (other)                                   | C  | 0.5333  | 0.5938  | T  | 0.2299    | 0.6316           | 0.782                  | 0.5133 | 0.2859 | 2.138 |
| CHR37_15114233; INTRONIC TO ADAM23                |    |         |         |    |           | P(CMH) 9.329e-05 | OR 1.83 (1.348-2.484)  |        |        |       |
| Breed                                             | A1 | F_A     | F_U     | A2 | CHISQ     | P                | OR                     | SE     | L95    | U95   |
| Belgian Shepherds                                 | T  | 0.7578  | 0.4796  | C  | 24.77     | 6.464e-07        | 3.395                  | 0.251  | 2.076  | 5.553 |
| Schipperkes                                       | T  | 0.2273  | 0.2266  | C  | 0.0001869 | 0.9891           | 1.004                  | 0.2962 | 0.5619 | 1.794 |
| Finnish Spitzs                                    | T  | 0.06897 | 0.06716 | C  | 0.003183  | 0.955            | 1.029                  | 0.5034 | 0.3836 | 2.759 |
| Beagles (Finnish hunting)                         | T  | 0.8462  | 0.5417  | C  | 6.861     | 0.008811         | 4.654                  | 0.6159 | 1.392  | 15.56 |
| Beagles (other)                                   | T  | 0.3667  | 0.375   | C  | 0.004608  | 0.9459           | 0.9649                 | 0.5262 | 0.344  | 2.706 |
| CHR37_15114321; INTRONIC TO ADAM23                |    |         |         |    |           | P(CMH) 5.074e-07 | OR 2.088 (1.563-2.788) |        |        |       |
| Breed                                             | A1 | F_A     | F_U     | A2 | CHISQ     | P                | OR                     | SE     | L95    | U95   |
| Belgian Shepherds                                 | T  | 0.6842  | 0.4635  | C  | 10.63     | 0.00111          | 2.507                  | 0.2861 | 1.431  | 4.393 |

|                                                   |    |        |        |    |         |                  |                        |        |        |       |
|---------------------------------------------------|----|--------|--------|----|---------|------------------|------------------------|--------|--------|-------|
| Schipperkes                                       | T  | 0.8    | 0.629  | C  | 9.133   | 0.00251          | 2.359                  | 0.2875 | 1.343  | 4.144 |
| Finnish Spitzs                                    | T  | 0.6696 | 0.5299 | C  | 4.942   | 0.02622          | 1.799                  | 0.2652 | 1.07   | 3.025 |
| Beagles (Finnish hunting)                         | T  | 0.9286 | 0.625  | C  | 8.405   | 0.003743         | 7.8                    | 0.7921 | 1.652  | 36.84 |
| Beagles (other)                                   | T  | 0.5333 | 0.5938 | C  | 0.2299  | 0.6316           | 0.782                  | 0.5133 | 0.2859 | 2.138 |
| CHR37_15114336; INTRONIC TO ADAM23                |    |        |        |    |         | P(CMH) 3.5e-12   | OR 2.587 (1.971-3.395) |        |        |       |
| Breed                                             | A1 | F_A    | F_U    | A2 | CHISQ   | P                | OR                     | SE     | L95    | U95   |
| Belgian Shepherds                                 | C  | 0.7628 | 0.4685 | G  | 34.38   | 4.541e-09        | 3.649                  | 0.2264 | 2.341  | 5.686 |
| Schipperkes                                       | C  | 0.8385 | 0.6349 | G  | 13.72   | 0.0002123        | 2.985                  | 0.3017 | 1.652  | 5.391 |
| Finnish Spitzs                                    | C  | 0.7155 | 0.5896 | G  | 4.325   | 0.03755          | 1.751                  | 0.2705 | 1.03   | 2.976 |
| Beagles (Finnish hunting)                         | C  | 0.9643 | 0.6667 | G  | 9.021   | 0.00267          | 13.5                   | 1.063  | 1.679  | 108.5 |
| Beagles (other)                                   | C  | 0.5333 | 0.5938 | G  | 0.2299  | 0.6316           | 0.782                  | 0.5133 | 0.2859 | 2.138 |
| CHR37_15115295 (BICF2P968072); INTRONIC TO ADAM23 |    |        |        |    |         | P(CMH) 3.283e-14 | OR 2.545 (1.993-3.251) |        |        |       |
| Breed                                             | A1 | F_A    | F_U    | A2 | CHISQ   | P                | OR                     | SE     | L95    | U95   |
| Belgian Shepherds                                 | A  | 0.756  | 0.4766 | G  | 46.77   | 7.985e-12        | 3.402                  | 0.1828 | 2.378  | 4.868 |
| Schipperkes                                       | A  | 0.8015 | 0.6286 | G  | 10.09   | 0.001487         | 2.386                  | 0.2771 | 1.386  | 4.107 |
| Finnish Spitzs                                    | A  | 0.7203 | 0.5909 | G  | 4.6     | 0.03197          | 1.783                  | 0.2709 | 1.049  | 3.033 |
| Beagles (Finnish hunting)                         | A  | 0.9643 | 0.6875 | G  | 8.151   | 0.004303         | 12.27                  | 1.065  | 1.522  | 98.94 |
| Beagles (other)                                   | A  | 0.5333 | 0.5667 | G  | 0.06734 | 0.7952           | 0.8739                 | 0.5193 | 0.3158 | 2.418 |
| CHR37_15115366 (BICF2P968073); INTRONIC TO ADAM23 |    |        |        |    |         | P(CMH) 3.594e-14 | OR 2.536 (1.987-3.237) |        |        |       |
| Breed                                             | A1 | F_A    | F_U    | A2 | CHISQ   | P                | OR                     | SE     | L95    | U95   |
| Belgian Shepherds                                 | A  | 0.754  | 0.4766 | G  | 46.29   | 1.019e-11        | 3.365                  | 0.182  | 2.356  | 4.808 |
| Schipperkes                                       | A  | 0.8015 | 0.6286 | G  | 10.09   | 0.001487         | 2.386                  | 0.2771 | 1.386  | 4.107 |
| Finnish Spitzs                                    | A  | 0.7203 | 0.5896 | G  | 4.723   | 0.02977          | 1.793                  | 0.27   | 1.056  | 3.044 |
| Beagles (Finnish hunting)                         | A  | 0.9643 | 0.6875 | G  | 8.151   | 0.004303         | 12.27                  | 1.065  | 1.522  | 98.94 |
| Beagles (other)                                   | A  | 0.5333 | 0.5667 | G  | 0.06734 | 0.7952           | 0.8739                 | 0.5193 | 0.3158 | 2.418 |
| CHR37_15116559; INTRONIC TO ADAM23                |    |        |        |    |         | P(CMH) 4.493e-12 | OR 2.404 (1.868-3.095) |        |        |       |
| Breed                                             | A1 | F_A    | F_U    | A2 | CHISQ   | P                | OR                     | SE     | L95    | U95   |
| Belgian Shepherds                                 | C  | 0.7602 | 0.4766 | T  | 47.75   | 4.844e-12        | 3.481                  | 0.1844 | 2.425  | 4.996 |
| Schipperkes                                       | C  | 0.8088 | 0.65   | T  | 8.793   | 0.003024         | 2.278                  | 0.281  | 1.313  | 3.951 |
| Finnish Spitzs                                    | C  | 0.7881 | 0.7761 | T  | 0.0531  | 0.8178           | 1.073                  | 0.3061 | 0.5889 | 1.955 |
| Beagles (Finnish hunting)                         | C  | 0.9643 | 0.7083 | T  | 7.313   | 0.006845         | 11.12                  | 1.067  | 1.374  | 89.95 |
| Beagles (other)                                   | C  | 0.6333 | 0.6333 | T  | 0       | 1                | 1                      | 0.5358 | 0.3499 | 2.858 |

| CHR37_15118894; INTRONIC TO ADAM23               |     |        |        |    |         | P(CMH) 1.138e-11 | OR 2.334 (1.82-2.991)  |        |        |       |
|--------------------------------------------------|-----|--------|--------|----|---------|------------------|------------------------|--------|--------|-------|
| Breed                                            | A1  | F_A    | F_U    | A2 | CHISQ   | P                | OR                     | SE     | L95    | U95   |
| Belgian Shepherds                                | G   | 0.752  | 0.4794 | A  | 44.85   | 2.123e-11        | 3.292                  | 0.1814 | 2.307  | 4.697 |
| Schipperkes                                      | G   | 0.8015 | 0.6286 | A  | 10.09   | 0.001487         | 2.386                  | 0.2771 | 1.386  | 4.107 |
| Finnish Spitzs                                   | G   | 0.7881 | 0.7761 | A  | 0.0531  | 0.8178           | 1.073                  | 0.3061 | 0.5889 | 1.955 |
| Beagles (Finnish hunting)                        | G   | 0.9643 | 0.6875 | A  | 8.151   | 0.004303         | 12.27                  | 1.065  | 1.522  | 98.94 |
| Beagles (other)                                  | G   | 0.5333 | 0.5667 | A  | 0.06734 | 0.7952           | 0.8739                 | 0.5193 | 0.3158 | 2.418 |
| CHR37_15119387; INTRONIC TO ADAM23               |     |        |        |    |         | P(CMH) 4.151e-15 | OR 2.881 (2.201-3.771) |        |        |       |
| Breed                                            | A1  | F_A    | F_U    | A2 | CHISQ   | P                | OR                     | SE     | L95    | U95   |
| Belgian Shepherds                                | C   | 0.754  | 0.4766 | T  | 46.29   | 1.019e-11        | 3.365                  | 0.182  | 2.356  | 4.808 |
| Schipperkes                                      | C   | 0.8088 | 0.65   | T  | 8.793   | 0.003024         | 2.278                  | 0.281  | 1.313  | 3.951 |
| Finnish Spitzs                                   | C   | 0.9576 | 0.8582 | T  | 7.197   | 0.007301         | 3.734                  | 0.5198 | 1.348  | 10.34 |
| Beagles (Finnish hunting)                        | C   | 0.9643 | 0.7083 | T  | 7.313   | 0.006845         | 11.12                  | 1.067  | 1.374  | 89.95 |
| Beagles (other)                                  | C   | 0.6333 | 0.6333 | T  | 0       | 1                | 1                      | 0.5358 | 0.3499 | 2.858 |
| CHR37_15121756 (BICF2P86747); INTRONIC TO ADAM23 |     |        |        |    |         | P(CMH) 1.686e-10 | OR 2.726 (1.993-3.729) |        |        |       |
| Breed                                            | A1  | F_A    | F_U    | A2 | CHISQ   | P                | OR                     | SE     | L95    | U95   |
| Belgian Shepherds                                | C   | 0.7619 | 0.4912 | T  | 44.52   | 2.512e-11        | 3.314                  | 0.1832 | 2.314  | 4.746 |
| Schipperkes                                      | C   | 0.9485 | 0.9643 | T  | 0.4118  | 0.5211           | 0.6825                 | 0.5983 | 0.2113 | 2.205 |
| Finnish Spitzs                                   | C   | 1      | 0.9925 | T  | 0.8841  | 0.3471           | NA                     | NA     | NA     | NA    |
| Beagles (Finnish hunting)                        | C   | 0.9643 | 0.75   | T  | 5.727   | 0.01671          | 9                      | 1.072  | 1.102  | 73.51 |
| Beagles (other)                                  | C   | 0.7    | 0.6667 | T  | 0.07702 | 0.7814           | 1.167                  | 0.5556 | 0.3926 | 3.467 |
| CHR37_15121845; INTRONIC TO ADAM23               |     |        |        |    |         | P(CMH) 3.682e-14 | OR 2.705 (2.081-3.514) |        |        |       |
| Breed                                            | A1  | F_A    | F_U    | A2 | CHISQ   | P                | OR                     | SE     | L95    | U95   |
| Belgian Shepherds                                | del | 0.754  | 0.4794 | T  | 45.32   | 1.673e-11        | 3.328                  | 0.1821 | 2.329  | 4.755 |
| Schipperkes                                      | del | 0.8015 | 0.6286 | T  | 10.09   | 0.001487         | 2.386                  | 0.2771 | 1.386  | 4.107 |
| Finnish Spitzs                                   | del | 0.9237 | 0.8433 | T  | 3.872   | 0.0491           | 2.251                  | 0.4204 | 0.9873 | 5.131 |
| Beagles (Finnish hunting)                        | del | 0.9643 | 0.6875 | T  | 8.151   | 0.004303         | 12.27                  | 1.065  | 1.522  | 98.94 |
| Beagles (other)                                  | del | 0.5333 | 0.5667 | T  | 0.06734 | 0.7952           | 0.8739                 | 0.5193 | 0.3158 | 2.418 |
| CHR37_15123005 (BICF2P86749); INTRONIC TO ADAM23 |     |        |        |    |         | P(CMH) 1.452e-10 | OR 2.789 (2.027-3.838) |        |        |       |
| Breed                                            | A1  | F_A    | F_U    | A2 | CHISQ   | P                | OR                     | SE     | L95    | U95   |
| Belgian Shepherds                                | C   | 0.7598 | 0.4912 | A  | 44.03   | 3.227e-11        | 3.277                  | 0.1824 | 2.292  | 4.685 |
| Schipperkes                                      | C   | 0.9706 | 0.9929 | A  | 1.923   | 0.1655           | 0.2374                 | 1.125  | 0.0262 | 2.152 |

|                                                   |    |        |        |     |         |                  |                        |        |        |       |
|---------------------------------------------------|----|--------|--------|-----|---------|------------------|------------------------|--------|--------|-------|
| Finnish Spitzs                                    | C  | 1      | 0.9925 | A   | 0.8841  | 0.3471           | NA                     | NA     | NA     | NA    |
| Beagles (Finnish hunting)                         | C  | 0.9643 | 0.75   | A   | 5.727   | 0.01671          | 9                      | 1.072  | 1.102  | 73.51 |
| Beagles (other)                                   | C  | 0.7    | 0.6667 | A   | 0.07702 | 0.7814           | 1.167                  | 0.5556 | 0.3926 | 3.467 |
| CHR37_15123950; INTRONIC TO ADAM23                |    |        |        |     |         | P(CMH) 9.56e-11  | OR 2.835 (2.056-3.91)  |        |        |       |
| Breed                                             | A1 | F_A    | F_U    | A2  | CHISQ   | P                | OR                     | SE     | L95    | U95   |
| Belgian Shepherds                                 | AA | 0.764  | 0.4912 | del | 45.02   | 1.947e-11        | 3.353                  | 0.1841 | 2.337  | 4.81  |
| Schipperkes                                       | AA | 0.9706 | 0.9929 | del | 1.923   | 0.1655           | 0.2374                 | 1.125  | 0.0262 | 2.152 |
| Finnish Spitzs                                    | AA | 1      | 0.9925 | del | 0.8841  | 0.3471           | NA                     | NA     | NA     | NA    |
| Beagles (Finnish hunting)                         | AA | 0.9643 | 0.75   | del | 5.727   | 0.01671          | 9                      | 1.072  | 1.102  | 73.51 |
| Beagles (other)                                   | AA | 0.7    | 0.6667 | del | 0.07702 | 0.7814           | 1.167                  | 0.5556 | 0.3926 | 3.467 |
| CFA37_15124213 (BICF2P890779); INTRONIC TO ADAM23 |    |        |        |     |         | P(CMH) 5.598e-10 | OR 2.687 (1.956-3.693) |        |        |       |
| Breed                                             | A1 | F_A    | F_U    | A2  | CHISQ   | P                | OR                     | SE     | L95    | U95   |
| Belgian Shepherds                                 | A  | 0.7598 | 0.5    | G   | 41.83   | 9.953e-11        | 3.164                  | 0.1815 | 2.217  | 4.516 |
| Schipperkes                                       | A  | 0.9706 | 0.9929 | G   | 1.923   | 0.1655           | 0.2374                 | 1.125  | 0.0262 | 2.152 |
| Finnish Spitzs                                    | A  | 1      | 0.9925 | G   | 0.8841  | 0.3471           | NA                     | NA     | NA     | NA    |
| Beagles (Finnish hunting)                         | A  | 0.9643 | 0.76   | G   | 5.393   | 0.02022          | 8.526                  | 1.071  | 1.045  | 69.54 |
| Beagles (other)                                   | A  | 0.7    | 0.6875 | G   | 0.01138 | 0.915            | 1.061                  | 0.5515 | 0.3598 | 3.126 |
| CHR37_15124474 (BICF2P890781); INTRONIC TO ADAM23 |    |        |        |     |         | P(CMH) 1.452e-10 | OR 2.789 (2.027-3.838) |        |        |       |
| Breed                                             | A1 | F_A    | F_U    | A2  | CHISQ   | P                | OR                     | SE     | L95    | U95   |
| Belgian Shepherds                                 | C  | 0.7598 | 0.4912 | T   | 44.03   | 3.227e-11        | 3.277                  | 0.1824 | 2.292  | 4.685 |
| Schipperkes                                       | C  | 0.9706 | 0.9929 | T   | 1.923   | 0.1655           | 0.2374                 | 1.125  | 0.0262 | 2.152 |
| Finnish Spitzs                                    | C  | 1      | 0.9925 | T   | 0.8841  | 0.3471           | NA                     | NA     | NA     | NA    |
| Beagles (Finnish hunting)                         | C  | 0.9643 | 0.75   | T   | 5.727   | 0.01671          | 9                      | 1.072  | 1.102  | 73.51 |
| Beagles (other)                                   | C  | 0.7    | 0.6667 | T   | 0.07702 | 0.7814           | 1.167                  | 0.5556 | 0.3926 | 3.467 |
