# Supplementary material for: Identification of a common risk haplotype for canine idiopathic epilepsy in the ADAM23 gene
Source: PubMed Central journal article supplement (PMC4470040; doi:10.1186/s12864-015-1651-9), 2015-06-18
Supplement: 12864_2015_1651_MOESM8_ESM.pdf [file 12864_2015_1651_MOESM8_ESM.pdf]

Chr37 14996659-14997373 bp canfam3.1

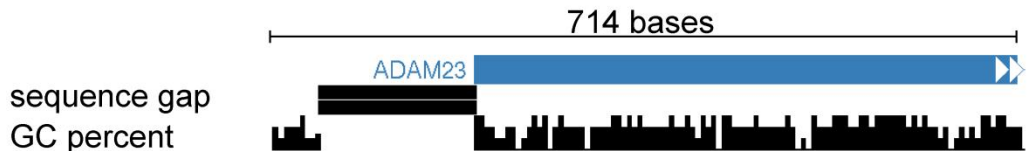

**ADAM23 5'**  
**190 bp gap region**

```
CCCTTGCTCCGCGGGCAGCGCATGCGCAGTGCGCCCGTGCCCGGCACT
AGCCACAGCGTCGGGACCGGCGTTCGGCGGCAGCATCAGGACCCCGGGC
GCGCTCTCGAGGGCGGGCGCCCCCCCCCCCCCGCGCGCCCCCGCG
CCCCGCGCCCCGCGCCCCGCGCCCCCGCGCCGCGCGCTCGCCCCGCGC
TCTCAGCATCCTCAGCCCCGCGCGCAGCCCCCGCAGTCTGCTGGAGCGGG
CGCGCCCCGCCGAGGGAGGGAGGAGCATCTGGGGCGGCTCCAAGTTGGC
GGAGCCGCGGGACCCCCGGACTCCTCCGCGGCCGCCGGGAGGGGCGG
AGAGGCGAGAGGCGAGCAGGGGAGGGGAGCCGCCGGCCGCCGTGCCGC
GCCCCGAGCCCCTGCCCTGCCCTGCCCTGCCCTGCCCTGCCCTGCCCT
GCCCGGGCCGCACCATGCGCGCCAGCCGGCGTGATCGGCCCCCGCCCG
CAGCCTCCCCGCAGCCTCCCCCGCGCTGTCGCCGCCACACCGAGCGG
CGCCCGGGAGCTATGAGCCATGAAGCCGCCCGGCAGCAGCTCCCGCGCG
CCGCCCGCGCGGGCTCCAGCCGGCCCCCGCGCTCCCGGGCCCCCGCG
GCGGCCCGCGCGGCCGGTGCCCGCCCGACGCCCCCTGCCGCTGCT
CCTCGTCCTTCTCCTGCTGCCTCCTCTCGCCACCTCGTCGGGCCCCCG
GCCTGGGGGGCGGCTGCGCCCAGCG
```

ADAM23 exon 1

Additional Figure 4. Overview of the *ADAM23* 5'- region and DNA sequence. Canine BAC clone CHORI82\_R4\_266G10 spanning the *ADAM23* region was sequenced using PacBio sequencing to uncover the genomic sequence of the unknown sequence 5' of *ADAM23*. The newly-identified 190-bp sequence is shown here along with *ADAM23* exon 1 genomic sequence. The translation starts at ATG highlighted in red. Both the newly-identified sequence and exon 1 have GC content above 80 percent and contain simple repetitive elements, highlighted in bold.
