# Supplementary material for: Identification of a common risk haplotype for canine idiopathic epilepsy in the ADAM23 gene
Source: PubMed Central journal article supplement (PMC4470040; doi:10.1186/s12864-015-1651-9), 2015-06-18
Supplement: 12864_2015_1651_MOESM9_ESM.pdf [file 12864_2015_1651_MOESM9_ESM.pdf]

Additional Table 4. Variants belonging to the IE-risk haplotype in Belgian Shepherds (BS) identified in the targeted next-generation sequencing are listed in black. Variants not identified in the resequencing but included in the validation are highlighted in grey. Twenty-seven variants were included in the validation in BS, Schipperkes, Finnish Spitzs and Beagles. Twenty-five variants were selected based on the targeted resequencing of BS. BICF2P1290526 was included in the validation, as it showed the strongest association in the combined genome-wide association analysis without BS. The non-synonymous variant at 15113939 bp is rare in BS, but was included because it was common in other breeds based on previous studies. The six variants belonging to the shared risk haplotype across breeds are bolded.

| Bp on CFA37 | Ref.      | Alt.       | SNP ID         | Gene          | Position | Function          | Validation |
|-------------|-----------|------------|----------------|---------------|----------|-------------------|------------|
| 15085438    | <i>G</i>  | <i>T</i>   | BICF2S23030950 | <i>ADAM23</i> | Intronic | NA                | Sequenom   |
| 15093174    | <i>T</i>  | <i>C</i>   | BICF2P1290526* | <i>ADAM23</i> | Intronic | NA                | Sequenom   |
| 15106446    | <i>T</i>  | <i>C</i>   | BICF2P1021781  | <i>ADAM23</i> | Intronic | NA                | Sequenom   |
| 15108133    | <i>T</i>  | <i>A</i>   | NA             | <i>ADAM23</i> | intronic | NA                | -          |
| 15108582    | <i>AA</i> | -          | NA             | <i>ADAM23</i> | intronic | NA                | -          |
| 15108593    | <i>A</i>  | -          | NA             | <i>ADAM23</i> | intronic | NA                | Sequenom   |
| 15108802    | <i>T</i>  | -          | NA             | <i>ADAM23</i> | intronic | NA                | Sequenom   |
| 15111179    | <i>A</i>  | -          | NA             | <i>ADAM23</i> | intronic | NA                | -          |
| 15111724    | <i>A</i>  | <i>G</i>   | BICF2P1131874* | <i>ADAM23</i> | intronic | NA                | Sequenom   |
| 15113325    | <i>A</i>  | <i>G</i>   | NA             | <i>ADAM23</i> | intronic | NA                | Sequenom   |
| 15113726    | <i>A</i>  | <i>G</i>   | NA             | <i>ADAM23</i> | intronic | NA                | Sangerseq. |
| 15113939    | <i>C</i>  | <i>T</i>   | NA             | <i>ADAM23</i> | exonic   | nonsynonymous SNV | Sangerseq. |
| 15113940    | <i>G</i>  | <i>A</i>   | NA             | <i>ADAM23</i> | exonic   | nonsynonymous SNV | Sequenom   |
| 15114127    | <i>G</i>  | <i>T</i>   | NA             | <i>ADAM23</i> | intronic | NA                | Sangerseq. |
| 15114156    | <i>T</i>  | <i>C</i>   | NA             | <i>ADAM23</i> | intronic | NA                | Sequenom   |
| 15114233    | <i>C</i>  | <i>T</i>   | NA             | <i>ADAM23</i> | intronic | NA                | Sangerseq. |
| 15114321    | <i>C</i>  | <i>T</i>   | NA             | <i>ADAM23</i> | intronic | NA                | Sangerseq. |
| 15114336    | <i>G</i>  | <i>C</i>   | NA             | <i>ADAM23</i> | intronic | NA                | Sangerseq. |
| 15115295    | <i>G</i>  | <i>A</i>   | BICF2P968072   | <i>ADAM23</i> | intronic | NA                | Sequenom   |
| 15115366    | <i>G</i>  | <i>A</i>   | BICF2P968073   | <i>ADAM23</i> | intronic | NA                | Sequenom   |
| 15116559    | <i>T</i>  | <i>C</i>   | NA             | <i>ADAM23</i> | intronic | NA                | Sequenom   |
| 15117171    | <i>T</i>  | <i>C</i>   | BICF2P302559   | <i>ADAM23</i> | intronic | NA                | -          |
| 15118890    | <i>A</i>  | <i>G</i>   | NA             | <i>ADAM23</i> | intronic | NA                | -          |
| 15118894    | <i>A</i>  | <i>G</i>   | NA             | <i>ADAM23</i> | intronic | NA                | Sequenom   |
| 15119387    | <i>T</i>  | <i>C</i>   | NA             | <i>ADAM23</i> | intronic | NA                | Sequenom   |
| 15120103    | <i>A</i>  | <i>G</i>   | NA             | <i>ADAM23</i> | intronic | NA                | -          |
| 15120108    | <i>G</i>  | <i>A</i>   | NA             | <i>ADAM23</i> | intronic | NA                | -          |
| 15120524    | <i>T</i>  | <i>C</i>   | BICF2P1352138  | <i>ADAM23</i> | intronic | NA                | -          |
| 15120746    | <i>T</i>  | <i>C</i>   | NA             | <i>ADAM23</i> | intronic | NA                | -          |
| 15120963    | -         | <i>TGT</i> | NA             | <i>ADAM23</i> | intronic | NA                | -          |
| 15121756    | <i>T</i>  | <i>C</i>   | BICF2P86747    | <i>ADAM23</i> | intronic | NA                | Sequenom   |
| 15121845    | <i>T</i>  | -          | NA             | <i>ADAM23</i> | intronic | NA                | Sequenom   |
| 15122108    | <i>G</i>  | <i>A</i>   | BICF2P86748    | <i>ADAM23</i> | intronic | NA                | -          |
| 15123005    | <i>A</i>  | <i>C</i>   | BICF2P86749    | <i>ADAM23</i> | intronic | NA                | Sequenom   |
| 15123950    | -         | <i>AA</i>  | NA             | <i>ADAM23</i> | intronic | NA                | Sequenom   |
| 15124213    | <i>G</i>  | <i>A</i>   | BICF2P890779*  | <i>ADAM23</i> | intronic | NA                | Sequenom   |
| 15124269    | <i>T</i>  | <i>C</i>   | BICF2P890780   | <i>ADAM23</i> | intronic | NA                | -          |
| 15124474    | <i>T</i>  | <i>C</i>   | BICF2P890781   | <i>ADAM23</i> | intronic | NA                | Sequenom   |
| 15181443    | -         | <i>T</i>   | NA             | <i>ADAM23</i> | intronic | NA                | Sequenom   |

\* SNP included in the Canine HD bead array; Bp: base pair position; Ref.: reference allele; Alt.: alternative allele, NA: not available
